# Supplementary material for: Fabrication and testing of zirconium-based nanoparticle-doped activated carbon fiber for enhanced arsenic removal in water
Source: Royal Society of Chemistry journal article supplement (doi:10.1039/c5ra25030g), 2016-01-01
Supplement: c5ra25030g1.pdf [file c5ra25030g1.pdf]

**Supplementary information of research paper of “Fabrication and testing of zirconium-based nano-particle doped activated carbon fiber for enhanced arsenic removal in water” by Dandan Zhao, Yang Yu, and J. Paul Chen**

**1. SEM image of NP doped ACF**

The SEM image of the NP doped ACF with an impregnation solution of 0.8-g Zr-based NP is shown in Fig. S1. It can be seen that, the agglomerates of the CTS and Zr-based NP become large and non-uniform. In addition, the sedimentation of the Zr-based NP in the impregnation solution could be observed with an impregnation solution with 0.8-g Zr-based NP. The results indicate the dosage of the Zr-based NP is more than enough for the coating process. Thus, the dosage of the Zr-based NP for the impregnation solution should not be too high to ensure a uniform coating.

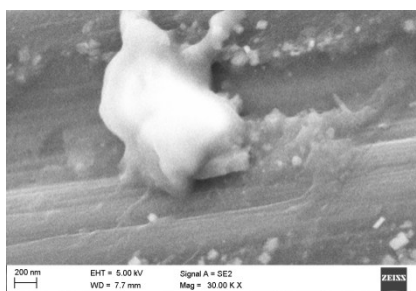

**Fig. S1.** SEM image of the NP doped ACF with an impregnation solution of 0.8-g Zr-based NP (magnification of 30,000).

**2.  $L_9(3)^4$  orthogonal array design approach**

The design and results of  $L_9(3)^4$  orthogonal experiment are given in Table S1.

**Table S1** Results of the  $L_9(3)^4$  orthogonal array design approach.

| Runs | Factors |         |           |        | $q_e$ (mg/g) |
|------|---------|---------|-----------|--------|--------------|
|      | CTS (%) | PEG (%) | Mw of CTS | Zr (g) |              |
| 1    | 0.1     | 0.1     | L         | 0.2    | 2.63         |
| 2    | 0.1     | 0.2     | M         | 0.4    | 2.70         |
| 3    | 0.1     | 0.3     | H         | 0.6    | 0.39         |
| 4    | 0.2     | 0.1     | M         | 0.6    | 1.16         |
| 5    | 0.2     | 0.2     | H         | 0.2    | 1.16         |
| 6    | 0.2     | 0.3     | L         | 0.4    | 0.52         |
| 7    | 0.3     | 0.1     | H         | 0.4    | 4.23         |
| 8    | 0.3     | 0.2     | L         | 0.6    | 9.25         |
| 9    | 0.3     | 0.3     | M         | 0.2    | 3.15         |

### 3. Two tail t-test statistical analyses

**Table S2** Two tail t-test statistical analyses.

| Source    | Sum of Squares | <i>df</i> | Mean Square | F Value | Sig.  |
|-----------|----------------|-----------|-------------|---------|-------|
| CTS       | 2.931          | 2         | 1.466       | 0.154   | 0.861 |
| PEG       | 13.721         | 2         | 6.861       | 0.886   | 0.46  |
| Mw of CTS | 8.265          | 2         | 4.133       | 0.478   | 0.642 |
| Zr        | 35.276         | 2         | 17.638      | 4.247   | 0.041 |
